# Supplementary material
Source: Elsevier journal article supplement (https://www.sciencedirect.com/science/article/pii/S0300289622003192)
Supplement: mmc1 [file S0300289622003192:mmc1.doc]

**The impact of altitude on mortality rates from COVID-19 in Mexico**

Supplementary Material

Table S1. Population characteristics of the municipalities by altitude

|  | Altitude (meters above sea level) | | | | | |
| --- | --- | --- | --- | --- | --- | --- |
| Variable | <500 | [500,1000) | [1000, 1500) | [1500, 2000) | [2000, 2500) | 2500+ |
| Municipalities, n (%) | 570 (29.5) | 185 (9.6) | 278 (14.4) | 431 (22.3) | 385 (20.0) | 80 (4.1) |
| Municipalities belonging to a metropolitan zone, n (%) | 87 (15.3) | 27 (14.6) | 43 (15.5) | 80 (18.6) | 146 (37.9) | 33 (41.2) |
| Population density, median (p25–p75) | 47.7  (20.2–98.5) | 53.0  (14.5–126.2) | 46.9  (18.5–131.9) | 78.4  (25.7–190.0) | 149.1  (55.8–612.0) | 205.1  (114.3–586.6) |
| Test by person, median (p25–p75) | 0.05  (0.03–0.08) | 0.05  (0.03–0.08) | 0.05  (0.03–0.08) | 0.06  (0.04–0.10) | 0.06  (0.04–0.10) | 0.06  (0.04–0.09) |

Table S2. Deaths and crude mortality rate per 100,000 population according altitude and human development index by gender

|  | Altitude (meters above sea level) | | | | | | |
| --- | --- | --- | --- | --- | --- | --- | --- |
| HDI | <500 | [500,1000) | [1000, 1500) | [1500, 2000) | [2000, 2500) | 2500+ | Total |
| **Women** |  |  |  |  |  |  |  |
| Deaths, n (%) |  |  |  |  |  |  |  |
| Low | 2 (0.004) | 0 (0.0) | 8 (0.02) | 13 (0.03) | 4 (0.01) | 0 (0.0) | 27 (0.06) |
| Medium | 902 (1.91) | 224 (.48) | 275 (0.58) | 918 (1.95) | 667 (1.42) | 178 (0.38) | 3,164 (6.71) |
| High | 6,467 (13.72) | 624 (1.32) | 2,281 (4.84) | 3,569 (7.57) | 4,943 (10.49) | 589 (1.25) | 18,473 (39.19) |
| Very high | 7,994 (16.95) | 1,894 (4.02) | 1,306 (2.77) | 4,508 (9.56) | 8,862 (18.80) | 915 (1.94) | 25,479 (54.04) |
| Total | 15,365 (32.58) | 2,742 (5.82) | 3,870 (8.21) | 9,008 (19.11) | 14,476 (30.71) | 1682 (3.57) | 47,143 (100.00) |
|  |  |  |  |  |  |  |  |
| Crude Mortality rate per 100,000 population | | |  |  |  |  |  |
| Low | 134.68 | 0 | 164.51 | 200.58 | 126.5 | 0 | 168.84 |
| Medium | 152.69 | 165.34 | 179.99 | 159.31 | 187.09 | 99.64 | 158.96 |
| High | 162.78 | 146.35 | 165.02 | 108.99 | 137.19 | 158.29 | 141.76 |
| Very high | 148.68 | 143.48 | 138.01 | 126.89 | 143.87 | 113.98 | 140.32 |
| Total | 154.55 | 145.7 | 155.66 | 121.57 | 143.02 | 124.27 | 142.02 |
|  |  |  |  |  |  |  |  |
| **Men** |  |  |  |  |  |  |  |
| Deaths, n (%) |  |  |  |  |  |  |  |
| Low | 2 (0.002) | 6 (0.007) | 7 (0.009) | 22 (0.027) | 14 (0.017) | 0 (0.0) | 51 (0.063) |
| Medium | 1,746 (2.15) | 383 (0.47) | 559 (0.69) | 1,485 (1.83) | 1,018 (1.25) | 348 (0.43) | 5,539 (6.82) |
| High | 10,109 (12.46) | 1,011 (1,25) | 3,900 (4.81) | 6,333 (7.81) | 9,553 (11.78) | 1248 (1.54) | 32,154 (39.64) |
| Very high | 12,659 (15.60) | 2,984 (3.68) | 2,044 (2,52) | 7,417 (9.14) | 16,734 (20.63) | 1553 (1.91) | 43,391 (53.48) |
| Total | 24,516 (30.21) | 4,384 (5.40) | 6,510 (8.02) | 15,257 (18.80) | 27,319 (33.68) | 3149 (3.88) | 81,135 (100.00) |
|  |  |  |  |  |  |  |  |
| Crude mortality rate per 100,000 population | | |  |  |  |  |  |
| Low | 158.73 | 259.52 | 242.05 | 423.16 | 179.83 | 0.00 | 262.24 |
| Medium | 230.21 | 185.02 | 291.80 | 225.06 | 243.81 | 152.71 | 224.96 |
| High | 233.96 | 228.10 | 250.34 | 201.44 | 235.04 | 293.44 | 230.40 |
| Very high | 236.71 | 211.93 | 213.01 | 220.18 | 286.37 | 237.33 | 246.79 |
| Total | 235.09 | 212.76 | 240.05 | 212.57 | 264.38 | 240.83 | 238.50 |

HDI: Human development index

Table S3. Deaths and crude mortality rate per 100,000 population according altitude and marginalization level by gender

|  | **Altitude (meters above sea level)** | | | | | | |
| --- | --- | --- | --- | --- | --- | --- | --- |
| ML | <500 | [500,1000) | [1000, 1500) | [1500, 2000) | [2000, 2500) | 2500+ | Total |
| **Women** |  |  |  |  |  |  |  |
| Deaths, n(%) |  |  |  |  |  |  |  |
| Very high | 48 (0.10) | 24 (0.05) | 16 (0.03) | 33 (0.07) | 17 (0.04) | 1 (0.002) | 139 (0.29) |
| High | 361 (0.77) | 110 (0.23) | 94 (0.20) | 79 (0.17) | 57 (0.12) | 42 (0.09) | 743 (1.58) |
| Medium | 790 (1.68) | 77 (0.16) | 125 (0.27) | 261 (0.55) | 226 (0.48) | 29 (0.06) | 1,508 (3.20) |
| Low | 1,929 (4.09) | 138 (0.29) | 277 (0.59) | 746 (1.58) | 695 (1.47) | 194 (0.41) | 3,979 (8.44) |
| Very low | 12,237 (25.96) | 2,393 (5.08) | 3,358 (7.12) | 7,889 (16.73) | 13,481 (28.60) | 1,416 (3.00) | 40,774 (86.49) |
| Total | 15,365 (32.59) | 2,742 (5.82) | 3,870 (8.21) | 9,008 (19.11) | 14,476 (30.71) | 1,682 (3.57) | 47,143 (100.00) |
|  |  |  |  |  |  |  |  |
|  |  |  |  |  |  |  |  |
| Crude Mortality rate per 100,000 population | |  |  |  |  |  |  |
| Very high | 108.49 | 114.25 | 155.61 | 85.00 | 138.31 | 212.31 | 109.35 |
| High | 165.94 | 168.50 | 181.30 | 168.48 | 224.30 | 72.27 | 159.75 |
| Medium | 146.27 | 139.77 | 184.74 | 172.79 | 160.15 | 142.35 | 154.60 |
| Low | 154.11 | 136.57 | 142.18 | 160.54 | 166.58 | 99.20 | 151.58 |
| Very low | 155.13 | 145.96 | 155.36 | 117.60 | 141.52 | 131.24 | 140.59 |
| Total | 154.55 | 145.70 | 155.67 | 121.57 | 143.02 | 124.27 | 142.02 |
|  |  |  |  |  |  |  |  |
| **Men** |  |  |  |  |  |  |  |
| Deaths, n(%) |  |  |  |  |  |  |  |
| Very high | 94 (0.12) | 52 (0.06) | 33 (0.04) | 69 (0.09) | 25 (0.03) | 0 (0.00) | 273 (0.34) |
| High | 664 (0.82) | 186 (0.23) | 199 (0.25) | 175 (0.22) | 105 (0.13) | 71 (0.09) | 1400 (1.73) |
| Medium | 1,499 (1.85) | 135 (0.17) | 273 (0.34) | 422 (0.52) | 379 (0.47) | 53 (0.07) | 2761 (3.40) |
| Low | 3,195 (3.94) | 246 (0.30) | 582 (0.72) | 1,233 (1.52) | 1,143 (1.41) | 439 (0.54) | 6,838 (8.43) |
| Very low | 19,064 (23.50) | 3,765 (4.64) | 5,423 (6.68) | 13,358 (16.46) | 25,667 (31.63) | 2,586 (3.19) | 69,863 (86.11) |
| Total | 24,516 (30.22) | 4,384 (5.40) | 6,510 (8.02) | 15,257 (18.80) | 27,319 (33.67) | 3,149 (3.88) | 81,135 (100.00) |
|  |  |  |  |  |  |  |  |
| Crude mortality rate per 100,000 population | |  |  |  |  |  |  |
| Very high | 160.12 | 115.35 | 252.14 | 162.31 | 193.35 | 0.00 | 158.43 |
| High | 235.41 | 209.37 | 287.39 | 305.25 | 286.60 | 118.15 | 235.61 |
| Medium | 226.22 | 154.19 | 347.70 | 241.67 | 231.26 | 169.38 | 230.37 |
| Low | 247.17 | 261.96 | 266.42 | 237.12 | 231.40 | 183.60 | 239.25 |
| Very low | 234.42 | 215.74 | 232.48 | 209.27 | 266.64 | 264.68 | 239.29 |
| Total | 235.09 | 212.76 | 240.05 | 212.57 | 264.38 | 240.83 | 238.50 |

ML: marginalization level

Table S4. Mortality rates per 100,000 population by age and altitude for women

|  | Altitude (meters above sea level) | | | | | |
| --- | --- | --- | --- | --- | --- | --- |
| Age group | <500 | [500,1000) | [1000, 1500) | [1500, 2000) | [2000, 2500) | 2500+ |
| 0-4 | 10 | 12 | 10 | 9 | 10 | 8 |
| 5–9 | 5 | NA | NA | 7 | 6 | 3 |
| 10–14 | 6 | NA | 6 | 2 | 3 | 4 |
| 15-19 | 5 | 12 | 6 | 7 | 7 | 9 |
| 20-24 | 10 | 13 | 6 | 9 | 8 | 15 |
| 25-29 | 14 | 8 | 15 | 13 | 14 | 22 |
| 30-34 | 21 | 18 | 31 | 20 | 21 | 23 |
| 35-39 | 32 | 30 | 27 | 24 | 30 | 38 |
| 40-44 | 52 | 46 | 51 | 43 | 51 | 68 |
| 45-54 | 97 | 80 | 96 | 73 | 89 | 106 |
| 50-54 | 151 | 105 | 149 | 115 | 137 | 131 |
| 55-59 | 238 | 181 | 224 | 194 | 214 | 221 |
| 60-64 | 361 | 302 | 335 | 292 | 311 | 308 |
| 65+ | 549 | 452 | 467 | 457 | 492 | 357 |

Table S5. Mortality rates per 100,000 population by age and altitude for men

|  | Altitude (meters above sea level) | | | | | |
| --- | --- | --- | --- | --- | --- | --- |
| Age group | <500 | [500,1000) | [1000, 1500) | [1500, 2000) | [2000, 2500) | 2500+ |
| 0-4 | 10 | 17 | 9 | 8 | 8 | 23 |
| 5–9 | 5 | 5 | 4 | 3 | 5 | 23 |
| 10–14 | 4 | 7 | 4 | 3 | 4 | 5 |
| 15-19 | 6 | 7 | 14 | 8 | 6 | 10 |
| 20-24 | 11 | 11 | 13 | 9 | 9 | 21 |
| 25-29 | 17 | 13 | 16 | 19 | 24 | 29 |
| 30-34 | 35 | 23 | 41 | 35 | 46 | 56 |
| 35-39 | 63 | 56 | 65 | 53 | 83 | 74 |
| 40-44 | 110 | 69 | 119 | 97 | 145 | 154 |
| 45-54 | 179 | 143 | 182 | 159 | 228 | 231 |
| 50-54 | 277 | 208 | 264 | 221 | 335 | 282 |
| 55-59 | 385 | 318 | 392 | 349 | 485 | 449 |
| 60-64 | 541 | 446 | 571 | 517 | 650 | 601 |
| 65+ | 915 | 767 | 846 | 883 | 1036 | 723 |

Table S6. Frequencies (%) of comorbidities according to altitude for women

|  | Altitude (meters above sea level, m.a.s.l.) | | | | | |  |
| --- | --- | --- | --- | --- | --- | --- | --- |
| Disease/condition | <500 | [500,1000) | [1000, 1500) | [1500, 2000) | [2000, 2500) | 2500+ | Total |
| Diabetes mellitus | 12,139 (31.4) | 2,280 (5.9) | 3,001 (7.8) | 7,785 (20.1) | 12,160 (31.4) | 1,307 (3.4) | 38,672 |
| COPD | 1,263 (24.3) | 259 (5.0) | 325 (6.3) | 1,357 (26.1) | 1,774 (34.1) | 221 (4.3) | 5,199 |
| Asthma | 917 (39.9) | 120 (5.2) | 163 (7.1) | 508 (22.1) | 560 (24.3) | 33 (1.4) | 2,301 |
| Hypertension | 15,186 (32.1) | 2,738 (5.8) | 3,615 (7.6) | 9,867 (20.8) | 14,571 (30.8) | 1,405 (3.0) | 47,382 |
| Cardio-vascular | 1,795 (34.4) | 356 (6.8) | 409 (7.8) | 1,081 (20.7) | 1,444 (27.7) | 132 (2.5) | 5,217 |
| Obesity | 7,201 (32.0) | 1,283 (5.7) | 1,567 (7.0) | 4,907 (21.8) | 6,925 (30.8) | 608 (2.7) | 22,491 |
| Chronic kidney | 2,458 (32.2) | 488 (6.4) | 553 (7.2) | 1,647 (21.5) | 2,243 (29.3) | 255 (3.3) | 7,644 |
| Pneumonia | 17,793 (28.3) | 3,489 (5.6) | 4,418 (7.0) | 11,504 (18.3) | 22,993 (36.6) | 2,621 (4.2) | 62,818 |
| Smoking | 809 (22.6) | 135 (3.8) | 273 (7.6) | 884 (24.7) | 1,405 (39.3) | 73 (2.0) | 3,579 |

Table S7. Frequencies (%) of comorbidities according to altitude for men

|  | Altitude (meters above sea level, m.a.s.l.) | | | | | |  |
| --- | --- | --- | --- | --- | --- | --- | --- |
| Disease/condition | <500 | [500,1000) | [1000, 1500) | [1500, 2000) | [2000, 2500) | 2500+ | Total |
| Diabetes mellitus | 15,339 (28.8) | 2,904 (5.5) | 3,702 (7.0) | 10,936 (20.5) | 18,480 (34.7) | 1,880 (3.5) | 53,241 |
| COPD | 1,596 (24.3) | 319 (4.9) | 462 (7.0) | 1,622 (24.7) | 2,326 (35.4) | 248 (3.8) | 6,573 |
| Asthma | 761 (39.3) | 109 (5.6) | 153 (7.9) | 364 (18.8) | 500 (25.8) | 48 (2.5) | 1,935 |
| Hyperten-sion | 18,864 (30.1) | 3,334 (5.3) | 4,552 (7.3) | 13,318 (21.3) | 20,534 (32.8) | 1,973 (3.2) | 62,575 |
| Cardio-vascular | 2,692 (32.4) | 491 (5.9) | 620 (7.5) | 1,731 (20.9) | 2,560 (30.9) | 203 (2.4) | 8,297 |
| Obesity | 8,319 (29.6) | 1,357 (4.8) | 1,847 (6.6) | 5,838 (20.8) | 9,839 (35.0) | 906 (3.2) | 28,106 |
| Chronic kidney | 3,100 (27.9) | 594 (5.4) | 737 (6.6) | 2,579 (23.2) | 3,688 (33.2) | 402 (3.6) | 11,100 |
| Pneumonia | 28,253 (26.4) | 5,490 (5.1) | 7,231 (6.8) | 19,414 (18.2) | 41,664 (39.0) | 4,818 (4.5) | 106,870 |
| Smoking | 3,626 (22.8) | 687 (4.3) | 1,122 (7.1) | 3,677 (23.1) | 6,303 (39.7) | 477 (3.0) | 15,892 |

Table S8. Frequencies (%) of comorbidities according human development index for women

|  | Human Developmen Index | | | |  |
| --- | --- | --- | --- | --- | --- |
| **Disease/condition** | Low | Medium | High | Very high | Total |
| Diabetes mellitus | 11 (0.1) | 2,169 (5.6) | 15,281 (39.5) | 21,211 (54.7) | 38,672 |
| COPD | 1 (0.1) | 508 (9.8) | 2,094 (40.3) | 2,596 (49.8) | 5,199 |
| Asthma | 1 (0.1) | 141 (6.1) | 871 (37.8) | 1,288 (56.0) | 2,301 |
| Hypertension | 12 (0.1) | 2,528 (5.3) | 18,162 (38.3) | 26,680 (56.2) | 47,382 |
| Cardiovascular | 2 (0.1) | 291 (5.6) | 1,943 (37.2) | 2,981 (57.0) | 5,217 |
| Obesity | 8 (0.1) | 1,354 (6.0) | 9,049 (40.2) | 12,080 (53.6) | 22,491 |
| Chronic kidney | 0 (0.0) | 399 (5.2) | 2,975 (38.8) | 4,270 (55.9) | 7,644 |
| Pneumonia | 27 (0.1) | 3,816 (6.1) | 23,779 (37.9) | 35,196 (56.0) | 62,818 |
| Smoking | 1 (0.1) | 133 (3.7) | 1,275 (35.6) | 2,170 (60.5) | 3,579 |

Table S9. Frequencies (%) of comorbidities according human development index for men

|  | Human Developmen Index | | | |  |
| --- | --- | --- | --- | --- | --- |
| Disease/condition | Low | Medium | High | Very high | Total |
| Diabetes mellitus | 20 (0.1) | 3,121 (5.9) | 20,640 (38.8) | 29,460 (55.3) | 53,241 |
| COPD | 5 (0.1) | 553 (8.4) | 2,631 (40.0) | 3,384 (51.5) | 6,573 |
| Asthma | 2 (0.1) | 147 (7.6) | 745 (38.5) | 1,041 (53.8) | 1,935 |
| Hypertension | 18 (0.1) | 3,477 (5.6) | 23,816 (38.1) | 35,264 (56.4) | 62,575 |
| Cardiovascular | 5 (0.1) | 468 (5.6) | 3,026 (36.5) | 4,798 (57.8) | 8,297 |
| Obesity | 10 (0.1) | 1,745 (6.2) | 11,315 (40.3) | 15,036 (53.5) | 28,106 |
| Chronic kidney | 5 (0.1) | 658 (5.9) | 4,178 (37.6) | 6,259 (56.4) | 11,100 |
| Pneumonia | 60 (0.1) | 6,782 (6.3) | 40,500 (37.9) | 59,528 (55.7) | 106,870 |
| Smoking | 11 (0.1) | 927 (5.8) | 6,165 (38.8) | 8,789 (55.3) | 15,892 |

Table S10. Frequencies (%) of comorbidities according marginalization level for women

|  | Marginalization level | | | | |  |
| --- | --- | --- | --- | --- | --- | --- |
| **Disease/condition** | Very high | High | Medium | Low | Very low | **Total** |
| Diabetes mellitus | 78 (0.2) | 458 (1.2) | 1041 (2.7) | 3061 (7.9) | 34034 (88) | 38,672 |
| COPD | 13 (0.2) | 115 (2.2) | 207 (4.0) | 556 (10.7) | 4310 (82.9) | 5,201 |
| Asthma | 1 (0.1) | 40 (1.7) | 66 (2.9) | 190 (8.3) | 2004 (87.0) | 2,301 |
| Hypertension | 83 (0.2) | 537 (1.1) | 1231 (2.6) | 3481 (7.3) | 42055 (88.7) | 47,387 |
| Cardiovascular | 10 (0.2) | 70 (1.3) | 112 (2.1) | 389 (7.5) | 4637 (88.9) | 5,218 |
| Obesity | 42 (0.2) | 264 (1.2) | 620 (2.8) | 1899 (8.4) | 19670 (87.4) | 22,495 |
| Chronic kidney | 19 (0.2) | 97 (1.3) | 208 (2.7) | 573 (7.5) | 6747 (88.3) | 7,644 |
| Pneumonia | 161 (0.3) | 836 (1.3) | 1722 (2.7) | 5086 (8.1) | 55022 (87.6) | 62,827 |
| Smoking | 6 (0.2) | 22 (0.6) | 48 (1.3) | 176 (4.9) | 3327 (93) | 3,579 |

Table S11. Frequencies (%) of comorbidities according marginalization level for men

|  | Marginalization level | | | | |  |
| --- | --- | --- | --- | --- | --- | --- |
| **Disease/condition** | Very high | High | Medium | Low | Very low | **Total** |
| Diabetes mellitus | 130 (0.2) | 693 (1.3) | 1515 (2.8) | 4225 (7.9) | 46682 (87.7) | 53,245 |
| COPD | 23 (0.3) | 109 (1.7) | 207 (3.1) | 614 (9.3) | 5620 (85.5) | 6,573 |
| Asthma | 4 (0.2) | 35 (1.8) | 74 (3.8) | 186 (9.6) | 1636 (84.5) | 1,935 |
| Hypertension | 124 (0.2) | 731 (1.2) | 1676 (2.7) | 4701 (7.5) | 55346 (88.4) | 62,578 |
| Cardiovascular | 15 (0.2) | 96 (1.2) | 221 (2.7) | 588 (7.1) | 7378 (88.9) | 8,298 |
| Obesity | 48 (0.2) | 352 (1.3) | 893 (3.2) | 2322 (8.3) | 24493 (87.1) | 28,108 |
| Chronic kidney | 19 (0.2) | 150 (1.4) | 312 (2.8) | 840 (7.6) | 9779 (88.1) | 11,100 |
| Pneumonia | 303 (0.3) | 1579 (1.5) | 3206 (3) | 8600 (8) | 93194 (87.2) | 106,882 |
| Smoking | 40 (0.3) | 149 (0.9) | 366 (2.3) | 1106 (7) | 14233 (89.5) | 15,894 |
